# Supplementary material for: The Complete Genome of Brucella Suis 019 Provides Insights on Cross-Species Infection
Source: MDPI journal article supplement (doi:10.3390/genes7020007), 2016-01-26
Supplement: s1 [file s1]

| Query_name             | Length | Single-copy | Function                                                           |
|------------------------|--------|-------------|--------------------------------------------------------------------|
| brucella-<br>chr1_1290 | 393    | ○           | transposase                                                        |
| brucella-<br>chr1_1291 | 369    | ○           | transposase                                                        |
| brucella-<br>chr1_1340 | 129    | ○           | hypothetical protein, partial                                      |
| brucella-<br>chr1_1847 | 777    | ●           | 3-mercaptopyruvate sulfurtransferase                               |
| brucella-<br>chr1_1918 | 369    | ○           | transposase                                                        |
| brucella-<br>chr1_1919 | 609    | ○           | queuine trna-ribosyltransferas                                     |
| brucella-<br>chr1_1972 | 369    | ○           | transposase                                                        |
| brucella-<br>chr1_239  | 2232   | ●           | gtp pyrophosphokinase rsh                                          |
| brucella-<br>chr1_277  | 1140   | ●           | cytochrome c-type biogenesis protein                               |
| brucella-<br>chr1_347  | 417    | ○           | transposase orfb                                                   |
| brucella-<br>chr1_705  | 393    | ○           | transposase                                                        |
| brucella-<br>chr1_706  | 369    | ○           | transposase                                                        |
| brucella-<br>chr1_995  | 4782   | ●           | outer membrane autotransporter barrel<br>domain-containing protein |
| brucella-<br>chr2_1    | 255    | ○           | protein                                                            |
| brucella-<br>chr2_2    | 882    | ○           | is3 family transposase orfb                                        |
| brucella-<br>chr2_256  | 393    | ○           | protein                                                            |
| brucella-<br>chr2_257  | 369    | ○           | transposase                                                        |
| brucella-<br>chr2_47   | 909    | ○           | is3 family transposase orfb                                        |
| brucella-<br>chr2_524  | 363    | ○           | transposase orfa                                                   |

Query= brucella-chr1\_239 # 247920 # 250151 # -1 #  
ID=1\_239;partial=00;start\_type=ATG;rbs\_motif=GGAG/GAGG;rbs\_spacer=5-  
10bp;gc\_cont=0.577  
(2232 letters)

|                                                   |                                                                       | Score  | E     |
|---------------------------------------------------|-----------------------------------------------------------------------|--------|-------|
|                                                   |                                                                       | (bits) | Value |
| Sequences producing significant alignments:       |                                                                       |        |       |
| <del>gb</del>  CP006961.1                         |                                                                       | 3157   | 0.0   |
| <br>                                              |                                                                       |        |       |
| > <del>gb</del>  CP006961.1                       |                                                                       |        |       |
| Length = 2107842                                  |                                                                       |        |       |
| Score = 3157 bits (2209), Expect = 0.0            |                                                                       |        |       |
| Identities = 2232/2253 (99%), Gaps = 21/2253 (0%) |                                                                       |        |       |
| Strand = Plus / Plus                              |                                                                       |        |       |
| <br>                                              |                                                                       |        |       |
| Query: 1                                          | atgatgcgccaatatgagcttgtggagcgtgtgcagcgataacaagcctgatgtgaacgag 60      |        |       |
|                                                   |                                                                       |        |       |
| Sbjct: 642046                                     | atgatgcgccaatatgagcttgtggagcgtgtgcagcgataacaagcctgatgtgaacgag 642105  |        |       |
| <br>                                              |                                                                       |        |       |
| Query: 61                                         | gcgcttcttaacaaggcatatgtttatgccatgcagaaacacggcgagtc----- 109           |        |       |
|                                                   |                                                                       |        |       |
| Sbjct: 642106                                     | gcgcttcttaacaaggcatatgtttatgccatgcagaaacacggcgagtcagaagcgggct 642165  |        |       |
| <br>                                              |                                                                       |        |       |
| Query: 110                                        | -----cctatttctcccatccgctggaagtggcggctatttctcacagatatgcat 159          |        |       |
|                                                   |                                                                       |        |       |
| Sbjct: 642166                                     | tccggcgatccctatttctcccatccgctggaagtggcggctatttctcacagatatgcat 642225  |        |       |
| <br>                                              |                                                                       |        |       |
| Query: 160                                        | ttggacgaggcgacaatcgccatcgcgcttctgcacgacacgatcgaggataccacggcc 219      |        |       |
|                                                   |                                                                       |        |       |
| Sbjct: 642226                                     | ttggacgaggcgacaatcgccatcgcgcttctgcacgacacgatcgaggataccacggcc 642285   |        |       |
| <br>                                              |                                                                       |        |       |
| Query: 220                                        | acccggcaggaaaatcgaccagcttttcgggccggaaaatcggaagcttgatcgaggggctg 279    |        |       |
|                                                   |                                                                       |        |       |
| Sbjct: 642286                                     | acccggcaggaaaatcgaccagcttttcgggccggaaaatcggaagcttgatcgaggggctg 642345 |        |       |
| <br>                                              |                                                                       |        |       |
| Query: 280                                        | accaagctcaagaaactcgatctcgtttccaagaaggctgtccaggcggaaaacctgcgt 339      |        |       |
|                                                   |                                                                       |        |       |
| Sbjct: 642346                                     | accaagctcaagaaactcgatctcgtttccaagaaggctgtccaggcggaaaacctgcgt 642405   |        |       |

The latter part of this record is omitted

Query= brucella-chr1\_239  
 (2232 letters)  
 Database: BSS2\_I0634.fa  
 1 sequences; 749 total letters

|                                                                          |                                                               | Score  | E     |
|--------------------------------------------------------------------------|---------------------------------------------------------------|--------|-------|
|                                                                          |                                                               | (bits) | Value |
| Sequences producing significant alignments:                              |                                                               |        |       |
| BSS2_I0634                                                               |                                                               | 1461   | 0.0   |
| >BSS2_I0634                                                              |                                                               |        |       |
|                                                                          | Length = 749                                                  |        |       |
| Score = 1461 bits (3781), Expect = 0.0                                   |                                                               |        |       |
| Identities = 742/749 (99%), Positives = 742/749 (99%), Gaps = 7/749 (0%) |                                                               |        |       |
| Frame = +1                                                               |                                                               |        |       |
| Query: 1                                                                 | MMRQYELVERVQRYKPDVNEALLNKAYVYAMQKHGS-----PYFSHPLEVAAILTDMH    | 159    |       |
|                                                                          | MMRQYELVERVQRYKPDVNEALLNKAYVYAMQKHGS PYFSHPLEVAAILTDMH        |        |       |
| Sbjct: 1                                                                 | MMRQYELVERVQRYKPDVNEALLNKAYVYAMQKHGSQKRASGDPYFSHPLEVAAILTDMH  | 60     |       |
| Query: 160                                                               | LDEATIAIALHDTIEDTTATRQEIDQLFGPEIGKLVEGLTKLKKLDLVSKKAVQAENLR   | 339    |       |
|                                                                          | LDEATIAIALHDTIEDTTATRQEIDQLFGPEIGKLVEGLTKLKKLDLVSKKAVQAENLR   |        |       |
| Sbjct: 61                                                                | LDEATIAIALHDTIEDTTATRQEIDQLFGPEIGKLVEGLTKLKKLDLVSKKAVQAENLR   | 120    |       |
| Query: 340                                                               | KLLLAISEDVRVLLVKLADRLHNMRTLGVMCEDKRLRIAEETMDIYAPLAGRMGMQDMRE  | 519    |       |
|                                                                          | KLLLAISEDVRVLLVKLADRLHNMRTLGVMCEDKRLRIAEETMDIYAPLAGRMGMQDMRE  |        |       |
| Sbjct: 121                                                               | KLLLAISEDVRVLLVKLADRLHNMRTLGVMCEDKRLRIAEETMDIYAPLAGRMGMQDMRE  | 180    |       |
| Query: 520                                                               | ELEELAFRYINPDRAWRAVTDRLAELLEKNRGLLQKIETDLSEIFEKNGIKASVKSQKKP  | 699    |       |
|                                                                          | ELEELAFRYINPDRAWRAVTDRLAELLEKNRGLLQKIETDLSEIFEKNGIKASVKSQKKP  |        |       |
| Sbjct: 181                                                               | ELEELAFRYINPDRAWRAVTDRLAELLEKNRGLLQKIETDLSEIFEKNGIKASVKSQKKP  | 240    |       |
| Query: 700                                                               | WSVFRKMETKGLSFEQLSDIFGFRVMVDTVQDCYRALGLIHTTWSMVPGRFKDYISTPKQ  | 879    |       |
|                                                                          | WSVFRKMETKGLSFEQLSDIFGFRVMVDTVQDCYRALGLIHTTWSMVPGRFKDYISTPKQ  |        |       |
| Sbjct: 241                                                               | WSVFRKMETKGLSFEQLSDIFGFRVMVDTVQDCYRALGLIHTTWSMVPGRFKDYISTPKQ  | 300    |       |
| Query: 880                                                               | NDYRSIHNTTIIGPSRQRIELQIRTREMDEIAEFGVAAHSIYKDRGSANNPHKISTETNAY | 1059   |       |
|                                                                          | NDYRSIHNTTIIGPSRQRIELQIRTREMDEIAEFGVAAHSIYKDRGSANNPHKISTETNAY |        |       |
| Sbjct: 301                                                               | NDYRSIHNTTIIGPSRQRIELQIRTREMDEIAEFGVAAHSIYKDRGSANNPHKISTETNAY | 360    |       |
| Query: 1060                                                              | AWLRQTIEQLSEGDNPPEEFLEHTKLELFQDQVFCFTPKGRILALPRGATPIDFAYAVHTD | 1239   |       |
|                                                                          | AWLRQTIEQLSEGDNPPEEFLEHTKLELFQDQVFCFTPKGRILALPRGATPIDFAYAVHTD |        |       |
| Sbjct: 361                                                               | AWLRQTIEQLSEGDNPPEEFLEHTKLELFQDQVFCFTPKGRILALPRGATPIDFAYAVHTD | 420    |       |
| Query: 1240                                                              | IGDSCVGAKVNGRIMPLMTELKNGDEVVDIIRSKAQVPPAAWESLVATGKARAAIRRATRS | 1419   |       |
|                                                                          | IGDSCVGAKVNGRIMPLMTELKNGDEVVDIIRSKAQVPPAAWESLVATGKARAAIRRATRS |        |       |
| Sbjct: 421                                                               | IGDSCVGAKVNGRIMPLMTELKNGDEVVDIIRSKAQVPPAAWESLVATGKARAAIRRATRS | 480    |       |

The latter part of this record is omitted

Query= brucella-chr1\_1847 # 1965361 # 1966137 # -1 #  
 ID=1\_1847;partial=00;start\_type=ATG;rbs\_motif=GGAGG;rbs\_spacer=5-  
 10bp;gc\_cont=0.574  
 (777 letters)

|                                               | Score  | E     |
|-----------------------------------------------|--------|-------|
|                                               | (bits) | Value |
| Sequences producing significant alignments:   |        |       |
| gb CP006961.1                                 | 1100   | 0.0   |
| gb CP006962.1                                 | 31     | 1.0   |
|                                               |        |       |
| >gb CP006961.1                                |        |       |
| Length = 2107842                              |        |       |
|                                               |        |       |
| Score = 1100 bits (769), Expect = 0.0         |        |       |
| Identities = 775/779 (99%), Gaps = 2/779 (0%) |        |       |
| Strand = Plus / Plus                          |        |       |

The first part of this record is omitted

```

Query: 481      atgcgcaagatcggttgatgaaaaacgctcgagattgccgatgcgcgtggcgcgggccgt 540
                |||
Sbjct: 1024952 atgcgcaagatcggttgatgaaaaacgctcgagattgccgatgcgcgtggcgcgggccgt 1025011

Query: 541      ttacggggcgcgacgcggaacctcgcgcggaatgcgctcgggccatatgccgggtgcg 600
                |||
Sbjct: 1025012 ttacggggcgcgacgcggaacctcgcgcggaatgcgctcgggccatatgccgggtgcg 1025071

Query: 601      cgcaatgttcctgttacaaccctttccgaaaacggtgaattgaaagacctcgaaagcctg 660
                |||
Sbjct: 1025072 cgcaatgttcctgttacaaccctttccgaaaacggtgaattgaaagacctcgaaagcctg 1025131

Query: 661      cgcaggatttttgacgaggcggtatcgacctgtcggggcccgtggtcaccagttgcggt 720
                |||
Sbjct: 1025132 cgcaggatttttgacgaggcggtatcgacctgtcggggcccgtggtcaccagttgcggt 1025191

Query: 721      ttcggtgttacgcgtgccgtgattacgctcgcgcttacctcg--ggggcaaaaggataa 777
                | |||
Sbjct: 1025192 ttcggtgttacgcgtgccgtgattacgctcgcgcttacctcgctggggcacaaggataa 1025250
  
```

Query= brucella-chr1\_277 # 295318 # 296457 # -1 #  
ID=1\_277;partial=00;start\_type=ATG;rbs\_motif=None;rbs\_spacer=None;gc\_content=0.619  
(1140 letters)

| Sequences producing significant alignments: | Score<br>(bits) | E<br>Value |
|---------------------------------------------|-----------------|------------|
| gb CP006961.1                               | 1625            | 0.0        |
| gb CP006962.1                               | 35              | 0.079      |

>gb|CP006961.1|  
Length = 2107842

Score = 1625 bits (1136), Expect = 0.0  
Identities = 1138/1140 (99%)  
Strand = Plus / Plus

The first part of this record is omitted

```

Query: 781      ccttggcgcgccagcttgagaaaaccattgccatccttcgtgatcccgcgagcgccaaa 840
                |||
Sbjct: 596520   ccttggcgcgccagcttgagaaaaccattgccatccttcgtgatcccgcgagcgccaaa 596579

Query: 841      caggcgagggcgaaaagggtccgagcgccgaagatgtcgaagcggcttcacgctcagcgcc 900
                |||
Sbjct: 596580   caggcgagggcgaaaagggtccgagcgccgaagatgtcgaagcggcttcacgctcagcgcc 596639

Query: 901      agagatcggcgaggcgatggtggaaggcatggttcaacgcctcgatgaaacacttcgccag 960
                |||
Sbjct: 596640   agagatcggcgaggcgatggtggaaggcatggttcaacgcctcgatgaaacacttcgccag 596699

Query: 961      aatggcggggatatcgatggctggaagcggctgggccgctcttatatgatcctcaaccgc 1020
                |||
Sbjct: 596700   aatggcggggatatcgatggctggaagcggctgggccgctcttatatgatcctcaaccgc 596759

Query: 1021     cgcaacgatgcgcaggatgcgctggctcgcgccatgaaggctcttcagggtgaaaaccgg 1080
                |||
Sbjct: 596760   cgcaacgatgcgcaggatgcgctggctcgcgccatgaaggctcttcagggtgaaaaccgg 596819

Query: 1081     accgaacttcaaagcttcgccaccacacttggactggacgtggggactgcacaagaatga 1140
                |||
Sbjct: 596820   accgaacttcaaagcttcgccaccacacttggactggacgtggggactgcacaagaatga 596879

```

Query= brucella-chr1\_995 # 1054415 # 1059196 # -1 #  
ID=1\_995;partial=00;start\_type=ATG;rbs\_motif=GGAG/GAGG;rbs\_spacer=5-  
10bp;gc\_cont=0.522  
(4782 letters)

```

Sequences producing significant alignments:

Score      E
(bits) Value

gb|CP006961.1|      6823    0.0
gb|CP006962.1|      242    2e-63

>gb|CP006961.1|
    Length = 2107842

Score = 6823 bits (4776), Expect = 0.0
Identities = 4780/4782 (99%), Gaps = 2/4782 (0%)
Strand = Plus / Plus

```

The first part of this record is omitted

```

Query: 3001      aaagctgatcttcattgattttaacacgtcagtcgggggggggggggcttattggggcaggt 3060
                |||
Sbjct: 1938311 aaagctgatcttcattgattttaacacgtcagtc--gggggggggggcttattggggcaggt 1938368

Query: 3061      gatgtaacgctcggcagcggaacattgactgtcaatcaaggcttcgacagtattttttcc 3120
                |||
Sbjct: 1938369 gatgtaacgctcggcagcggaacattgactgtcaatcaaggcttcgacagtattttttcc 1938428

Query: 3121      ggcgtcatatctggagacggggggctgaacaaaagcggcgcggggcagttaactctttca 3180
                |||
Sbjct: 1938429 ggcgtcatatctggagacggggggctgaacaaaagcggcgcggggcagttaactctttca 1938488

Query: 3181      ggcgccaataacttatggcgcgccacgaccattgatggaggggtgctccttcaagggtgag 3240
                |||
Sbjct: 1938489 ggcgccaataacttatggcgcgccacgaccattgatggaggggtgctccttcaagggtgag 1938548

Query: 3241      agcggagctttcagcagtagttccgcctatcgaaccggcgcaagcggaaccgtggattta 3300
                |||
Sbjct: 1938549 agcggagctttcagcagtagttccgcctatcgaaccggcgcaagcggaaccgtggattta 1938608

```

The latter part of this record is omitted
